# Supplementary material for: Phosphorylation of Cysteine String Protein Triggers a Major Conformational Switch
Source: PubMed Central journal article supplement (PMC4975591; doi:10.1016/j.str.2016.06.009), 2016-08-02
Supplement: mmc1.pdf [file mmc1.pdf]

**Structure, Volume 24**

**Supplemental Information**

**Phosphorylation of Cysteine String Protein**

**Triggers a Major Conformational Switch**

**Pryank Patel, Gerald R. Prescott, Robert D. Burgoyne, Lu-Yun Lian, and Alan Morgan**

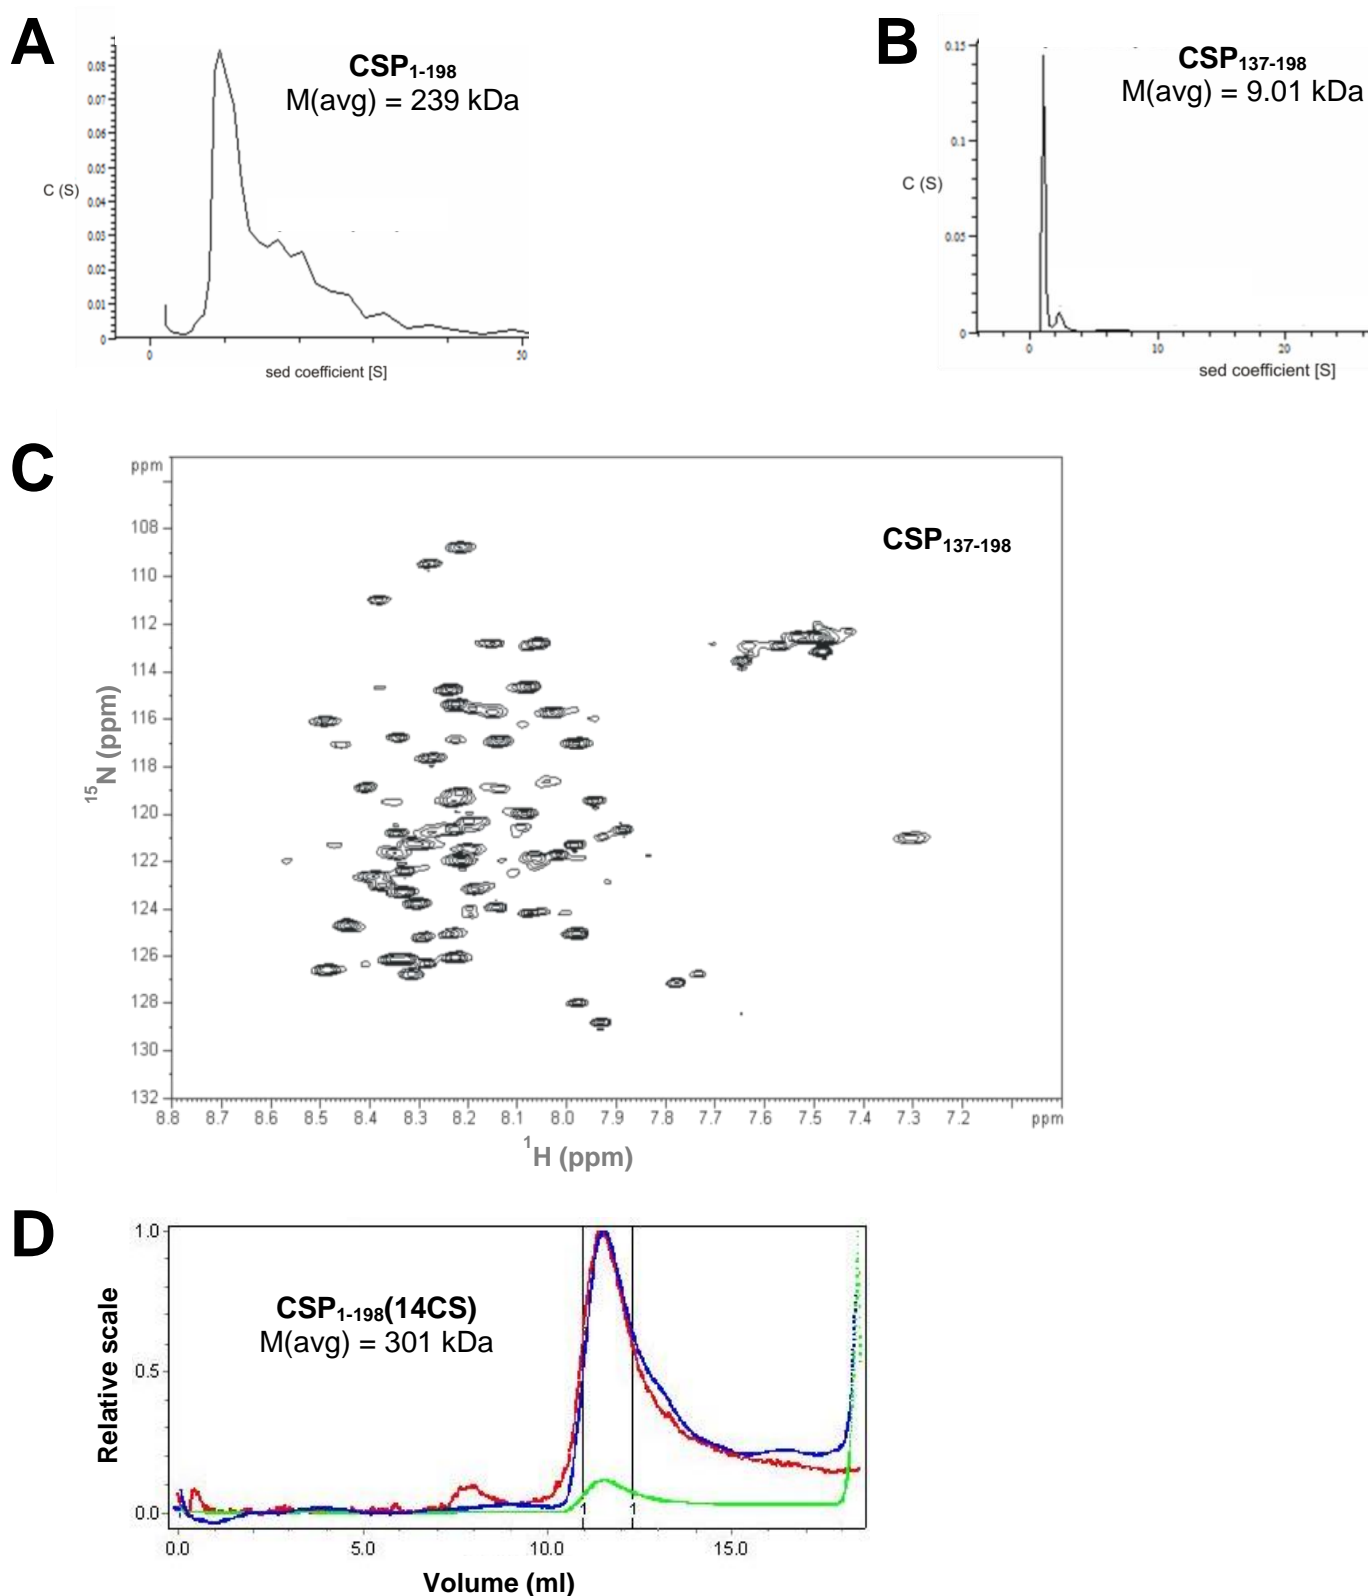

**Fig. S1, related to Fig. 1: Characterisation of recombinant CSP constructs**

a) Analytical ultracentrifugation of full length CSP<sub>1-198</sub>. b) Analytical ultracentrifugation of CSP<sub>137-198</sub>. c) <sup>1</sup>H-<sup>15</sup>N HSQC spectra of CSP<sub>137-198</sub>. d) Size exclusion chromatography - multiple angle laser light scattering analysis of full length CSP<sub>1-198</sub> with all 14 cysteines mutated to serines (14CS).

**A**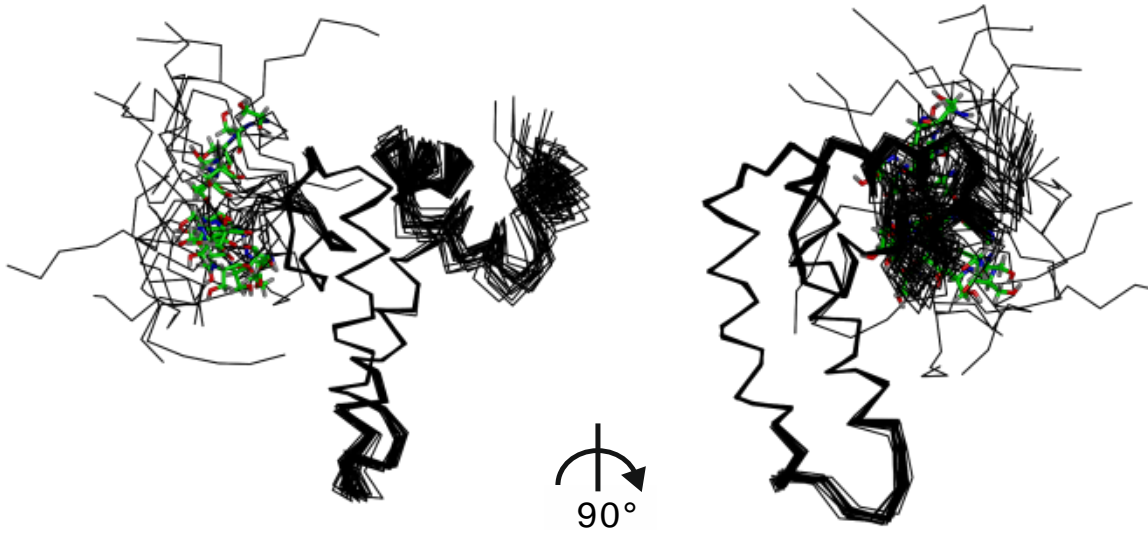**B**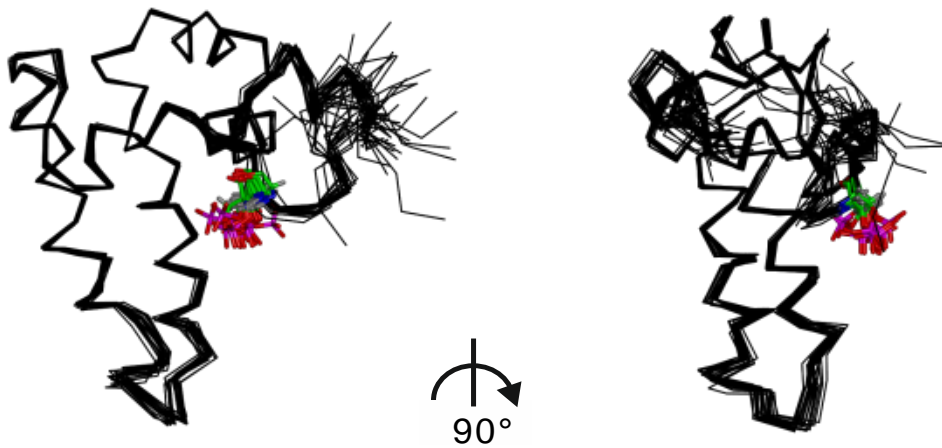

**Fig. S2, related to Fig. 2: Structures of unphosphorylated and Ser10-phosphorylated CSP<sub>1-100</sub>.**

Ensembles of the 20 lowest energy conformers of CSP<sub>1-100</sub> (a) and pCSP<sub>1-100</sub> (b) displayed as C $\alpha$  backbone representations; two different views differing by 90° are shown for each, with Ser10 represented as sticks.

**A**

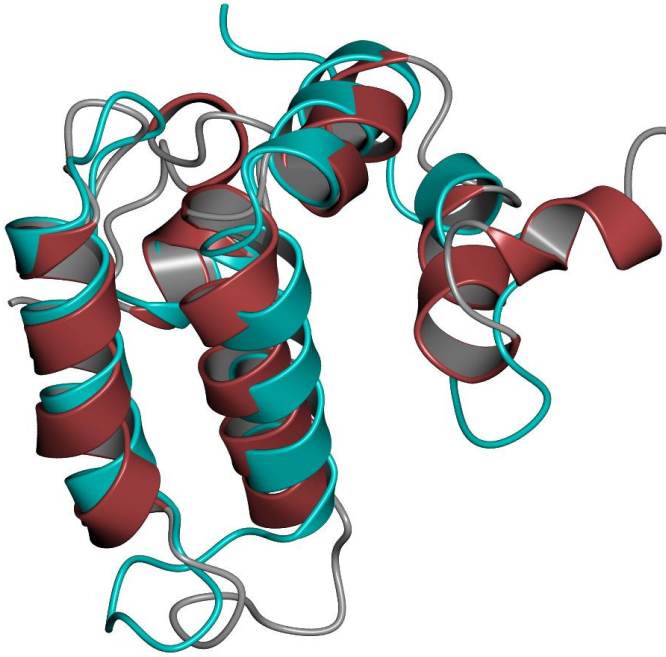

**B**

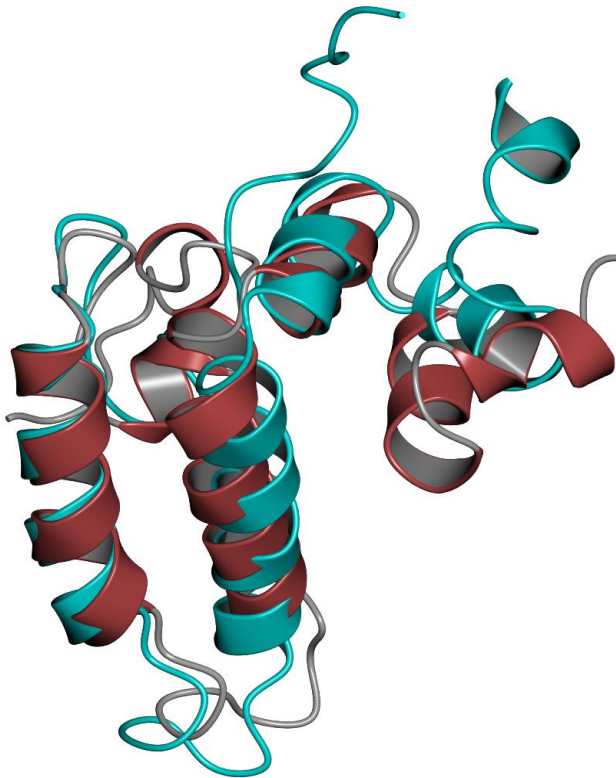

**Fig. S3, related to Fig. 2: Structural similarities between CSP<sub>1-100</sub> and DnaJ/Hsp40 proteins in the unphosphorylated state.**

a) Overlay of the lowest energy conformer of CSP<sub>1-100</sub> (red) with the J domain of yeast Sis1 protein (PDB code: 4RWU, cyan). b) Overlay of the lowest energy conformer of CSP<sub>1-100</sub> (red) with CSP<sub>5-100</sub> (PDB code: 2CTW, blue).

**A**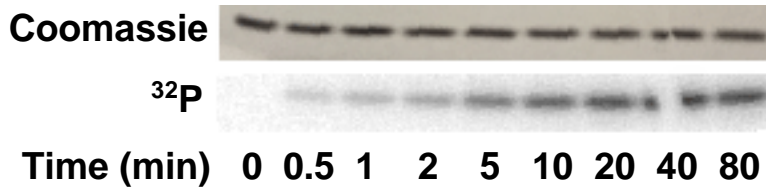**B**

| Sequence          | # PSMs | Modifications                | IonScore | Exp Value | Charge | MH+ [Da] | ΔM [ppm] | RT [min] | # Missed Cleavages |
|-------------------|--------|------------------------------|----------|-----------|--------|----------|----------|----------|--------------------|
| SLsTSGESLYHVLGLDK | 153    | S10(Phospho)                 | 63       | 0.000     | 2      | 1885.895 | 0.31     | 67.11    | 0                  |
| sLsTSGESLYHVLGLDK | 33     | N-Term(Acetyl); S10(Phospho) | 50       | 0.000     | 2      | 1927.906 | 0.52     | 77.20    | 0                  |
| sLsTSGESLYHVLGLDK | 33     | S8(Phospho); S10(Phospho)    | 40       | 0.002     | 2      | 1965.861 | 0.16     | 76.41    | 0                  |

**Fig. S4, related to Fig. 3: *in vitro* phosphorylation of CSP<sub>1-100</sub>.**

a) Kinetics of  $\gamma^{32}$ -ATP incorporation following incubation of CSP<sub>1-100</sub> with protein kinase A and radiolabelled MgATP. Samples were run on SDS-PAGE and visualised by Coomassie Blue staining (*Coomassie*, upper panel) and phosphorimaging ( $^{32}$ P, lower panel). Images shown are cropped to remove unnecessary blank space. b) Mass spectrometric identification of phosphorylation sites on CSP<sub>1-100</sub> after incubation with protein kinase A and MgATP.
