# Supplementary material for: Phosphorylation of Cysteine String Protein Triggers a Major Conformational Switch
Source: PubMed Central journal article supplement (PMC4975591; doi:10.1016/j.str.2016.06.009), 2016-08-02
Supplement: mmc2.pdf [file mmc2.pdf]

# Structure

## Phosphorylation of Cysteine String Protein Triggers a Major Conformational Switch

### Graphical Abstract

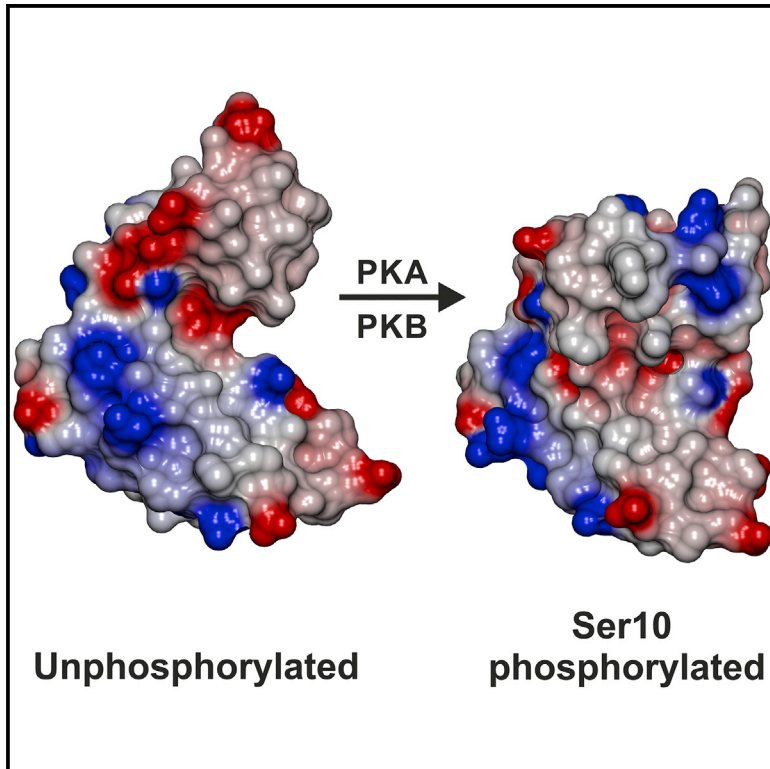

### Authors

Pryank Patel, Gerald R. Prescott,  
Robert D. Burgoyne, Lu-Yun Lian,  
Alan Morgan

### Correspondence

lu-yun.lian@liverpool.ac.uk (L.-Y.L.),  
amorgan@liverpool.ac.uk (A.M.)

### In Brief

Cysteine string protein (CSP) is phosphorylated in vivo on Ser10, and this modulates its protein interactions and effects on neurotransmitter release. Patel et al. report that Ser10 phosphorylation disrupts CSP's extreme N-terminal  $\alpha$  helix, which triggers formation of a hairpin loop stabilized by ionic interactions between phosphoSer10 and the J-domain residue, Lys58.

### Highlights

- First structure of a phosphorylated DnaJ/Hsp40 protein
- Phosphorylation destabilizes CSP's N-terminal  $\alpha$  helix
- Newly disordered, phosphorylated N-terminal loop binds to the J domain
- Phosphorylation causes significant changes to CSP conformation and surface charge

### Accession Numbers

2N05  
2N04

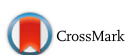

# Phosphorylation of Cysteine String Protein Triggers a Major Conformational Switch

Pryank Patel,<sup>1,2,3</sup> Gerald R. Prescott,<sup>1,4</sup> Robert D. Burgoyne,<sup>1</sup> Lu-Yun Lian,<sup>2,\*</sup> and Alan Morgan<sup>1,\*</sup>

<sup>1</sup>Department of Cellular and Molecular Physiology, Institute of Translational Medicine

<sup>2</sup>NMR Centre for Structural Biology, Institute of Integrative Biology  
University of Liverpool, Crown Street, Liverpool L69 3BX, UK

<sup>3</sup>Department of Biological and Environmental Sciences, University of Hertfordshire, Hatfield AL10 9AB, UK

<sup>4</sup>Present address: School of Biology, University of St Andrews, North Haugh, St Andrews KY16 9ST, UK

\*Correspondence: [lu-yun.lian@liverpool.ac.uk](mailto:lu-yun.lian@liverpool.ac.uk) (L.-Y.L.), [amorgan@liverpool.ac.uk](mailto:amorgan@liverpool.ac.uk) (A.M.)

<http://dx.doi.org/10.1016/j.str.2016.06.009>

## SUMMARY

Cysteine string protein (CSP) is a member of the DnaJ/Hsp40 chaperone family that localizes to neuronal synaptic vesicles. Impaired CSP function leads to neurodegeneration in humans and model organisms as a result of misfolding of client proteins involved in neurotransmission. Mammalian CSP is phosphorylated *in vivo* on Ser10, and this modulates its protein interactions and effects on neurotransmitter release. However, there are no data on the structural consequences of CSP phosphorylation to explain these functional effects. We show that Ser10 phosphorylation causes an order-to-disorder transition that disrupts CSP's extreme N-terminal  $\alpha$  helix. This triggers the concomitant formation of a hairpin loop stabilized by ionic interactions between phosphoSer10 and the highly conserved J-domain residue, Lys58. These phosphorylation-induced effects result in significant changes to CSP conformation and surface charge distribution. The phospho-switch revealed here provides structural insight into how Ser10 phosphorylation modulates CSP function and also has potential implications for other DnaJ phosphoproteins.

## INTRODUCTION

CSP is a member of the DnaJ/Hsp40 family of molecular chaperone proteins. It is highly expressed in all neurons, where it localizes to synaptic vesicle membranes (Chamberlain and Burgoyne, 2000). Mammals express three CSP isoforms ( $\alpha$ ,  $\beta$ ,  $\gamma$ ), but CSP $\alpha$  is the major brain isoform and is the ortholog of the single CSP expressed in invertebrates. Human CSP $\alpha$  is encoded by the *DNAJC5* gene, mutations in which cause the neurodegenerative disorder, adult-onset dominant neuronal ceroid lipofuscinosis (Noskova et al., 2011). As mutations in CSP-encoding genes also cause neurodegeneration in flies (Zinsmaier et al., 1994), worms (Kashyap et al., 2014), and mice (Fernandez-Chacon et al., 2004), it is clear that CSP performs a universal neuroprotective function (Burgoyne and Morgan, 2015). CSP is widely thought to prevent neurodegeneration by promoting the correct conforma-

tion of presynaptic proteins involved in synaptic exo/endocytosis. Compelling evidence suggests that the SNARE protein SNAP-25 is one such protein, whose misfolding in the absence of CSP leads to neurodegeneration (Burgoyne and Morgan, 2011; Sharma et al., 2011, 2012). However, numerous other CSP-binding proteins have been suggested as functionally relevant client proteins for refolding, including the SNARE protein syntaxin (Chamberlain et al., 2001; Evans et al., 2001; Nie et al., 1999; Swayne et al., 2006); the calcium sensor synaptotagmin (Boal et al., 2011; Evans and Morgan, 2002); G protein subunits (Magga et al., 2000); and the endocytic protein dynamin (Zhang et al., 2012).

CSP has an evolutionarily conserved domain structure (Figure 1A). The J domain is a signature of the DnaJ/Hsp40 family of molecular chaperones, which bind misfolded proteins and recruit/activate the 70 kDa heat shock cognate protein (Hsc70/Hsp70) to regulate protein folding (Hennessy et al., 2005). Indeed, CSP binds Hsc70 and stimulates its ATPase activity, and prevents aggregation of denatured proteins (Braun et al., 1996; Chamberlain and Burgoyne, 1997a, 1997b). All other domains are unique to CSP homologs. The cysteine string domain comprises 13–15 cysteine residues in an approximately 25-amino-acid motif, most of which are palmitoylated (Gundersen et al., 1994). This domain is essential for targeting CSP to synaptic vesicles and for neurotransmitter release *in vivo* (Arnold et al., 2004; Chamberlain and Burgoyne, 1998; Greaves and Chamberlain, 2006; Ohyama et al., 2007; Stowers and Isacoff, 2007). The function of the linker region connecting the J domain to the cysteine string is unclear, as mutation of this domain has relatively mild effects on CSP phenotypes (Arnold et al., 2004; Bronk et al., 2005; Zhang et al., 1999), although it may regulate binding to synaptotagmin (Boal et al., 2011). The C-terminal domain displays relatively low sequence conservation among CSP homologs from various species; and its function is poorly understood. Finally, CSPs contain a short N-terminal polypeptide sequence that is phosphorylated *in vivo* from worms to humans (Collins et al., 2005; Evans and Morgan, 2005; Evans et al., 2001; Hilger et al., 2009; Zielinska et al., 2009). Phosphorylation of mammalian CSP $\alpha$  on Ser10 inhibits binding to syntaxin and synaptotagmin, but not Hsc70, (Evans and Morgan, 2002; Evans et al., 2001) and modulates cellular exocytosis release kinetics (Chiang et al., 2014; Evans et al., 2001). However, there are no data on how Ser10 phosphorylation affects CSP structure to bring about these functional changes. Here we report the nuclear magnetic resonance (NMR) structures of the CSP N terminus in both the unphosphorylated and phosphorylated states.

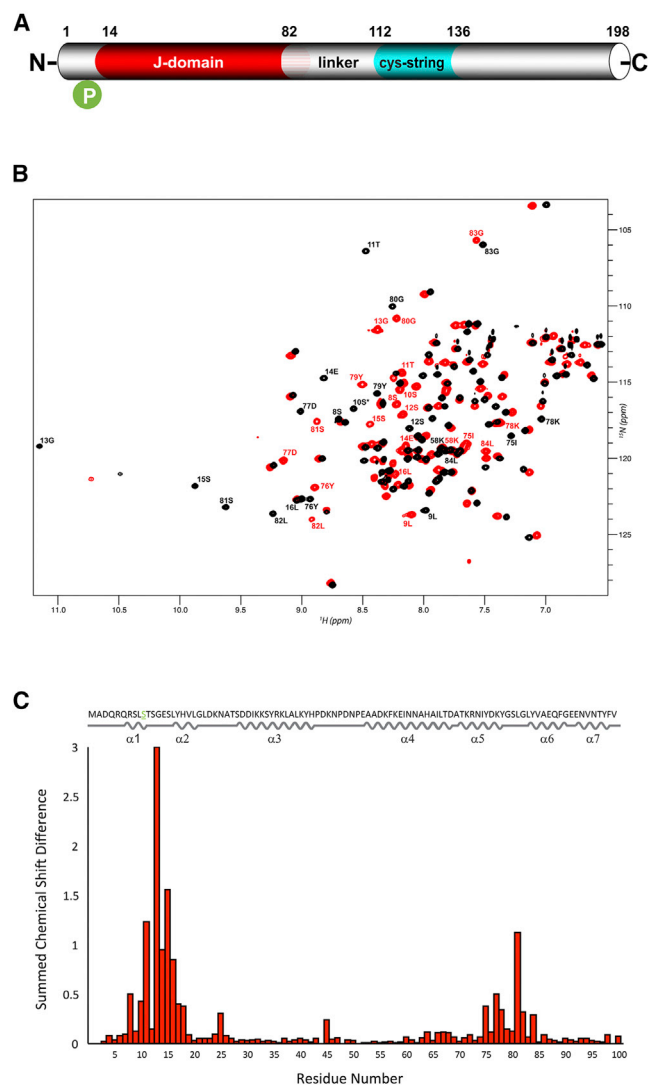

**Figure 1. NMR Analysis of Unphosphorylated and Phosphorylated CSP<sub>1-100</sub>**

(A) Domain structure of CSP.

(B) <sup>1</sup>H-<sup>15</sup>N HSQC spectra of CSP<sub>1-100</sub> (red) and pCSP<sub>1-100</sub> (black). The HSQC spectra shows well-resolved, non-overlapping peaks indicating both CSP<sub>1-100</sub> and pCSP<sub>1-100</sub> are folded. Upon phosphorylation, chemical shift dispersion can be observed for the indicated residues around Ser10 and Ser81.

(C) Chemical shift differences ( $\Delta\delta$ ) between CSP<sub>1-100</sub> and pCSP<sub>1-100</sub> amide resonances, calculated using  $\Delta\delta = [(\delta_{\text{H}})^2 + (\delta_{\text{HN}} \cdot 0.15)^2]^{1/2}$ . The amino acid sequence and secondary structure elements of CSP<sub>1-100</sub> obtained from the NMR structure are shown at the top of the figure.

## RESULTS

### Generation of Soluble, Monomeric CSP Constructs for NMR

To investigate the structural consequences of phosphorylation on mammalian CSP $\alpha$ , we purified bacterially expressed recombinant proteins for analysis. Full-length CSP<sub>1-198</sub> formed mixed oligomers of >239 kDa, based on analytical ultracentrifugation (AUC) analysis (Figure S1A), representing at least

**Table 1. NMR and Refinement Statistics for Protein Structures**

|                                                                    | CSP 1-100        | pCSP 1-100      |
|--------------------------------------------------------------------|------------------|-----------------|
| <b>NMR Distance and Dihedral Constraints</b>                       |                  |                 |
| <b>Distance constraints</b>                                        |                  |                 |
| Total NOE                                                          | 2,450            | 3,120           |
| Intra-residue                                                      | 851              | 968             |
| Inter-residue                                                      | 1,599            | 2,152           |
| Sequential ( $ i - j  = 1$ )                                       | 655              | 839             |
| Medium-range ( $2 \leq  i - j  \leq 4$ )                           | 530              | 758             |
| Long-range ( $ i - j  \geq 5$ )                                    | 414              | 555             |
| Total dihedral angle restraints                                    | 187              | 181             |
| $\phi$                                                             | 92               | 90              |
| $\psi$                                                             | 95               | 91              |
| <b>Structure Statistics</b>                                        |                  |                 |
| <b>Violations (mean and SD)</b>                                    |                  |                 |
| Distance constraints (Å)                                           | 0.08 ± 0.06      | 0.07 ± 0.07     |
| Dihedral angle constraints (°)                                     | 1.15 ± 0.88      | 1.44 ± 1.10     |
| Max. dihedral angle violation (°)                                  | 4.79             | 5.57            |
| Max. distance constraint violation (Å)                             | 0.72             | 1.13            |
| <b>Deviations from idealized geometry</b>                          |                  |                 |
| Bond lengths (Å)                                                   | 0.0041 ± 0.00013 | 0.0050 ± 0.0001 |
| Bond angles (°)                                                    | 0.59 ± 0.012     | 0.65 ± 0.016    |
| Impropers (°)                                                      | 1.54 ± 0.056     | 1.59 ± 0.067    |
| <b>Average pairwise root-mean-square deviation<sup>a</sup> (Å)</b> |                  |                 |
| Heavy                                                              | 0.47             | 0.49            |
| Backbone                                                           | 0.14             | 0.20            |
| <b>Ramachandran statistics<sup>b</sup></b>                         |                  |                 |
| Most favored/additionally allowed/generously allowed (%)           | 88.2/11.8/0.0    | 80.6/18.3/1.1   |

<sup>a</sup>Statistics are calculated and averaged over an ensemble of the 20 lowest-energy water-refined structures out of 100 calculated structures.

<sup>b</sup>Ramachandran statistics calculated using PROCHECK.

ten subunits based on the predicted monomeric mass of 23.5 kDa. In contrast, the C-terminal domain construct CSP<sub>137-198</sub> was monodisperse with an estimated molecular mass of 9.0 kDa, close to its predicted monomeric mass of 8.2 kDa (Figure S1B). The heteronuclear single quantum coherence (HSQC) spectrum for <sup>15</sup>N-labeled CSP<sub>137-198</sub> shows poor <sup>1</sup>H chemical shift dispersion, with most resonances appearing between 7.9 and 8.6 ppm, indicating that the C-terminal domain is essentially unstructured (Figure S1C). It has been suggested that CSP's tendency to aggregate may be due to the cysteine string domain (Swayne et al., 2003). However, mutation of all 14 cysteines to serines in full-length CSP<sub>1-198</sub> did not reduce oligomerization (Figure S1D), and a CSP<sub>1-112</sub> construct that lacks the entire cysteine string precipitated into visible aggregates. In contrast, CSP<sub>1-100</sub> was monomeric with well-dispersed resonances in the <sup>1</sup>H-<sup>15</sup>N HSQC spectra (Figure 1B). Further structural work was therefore performed using CSP<sub>1-100</sub>.

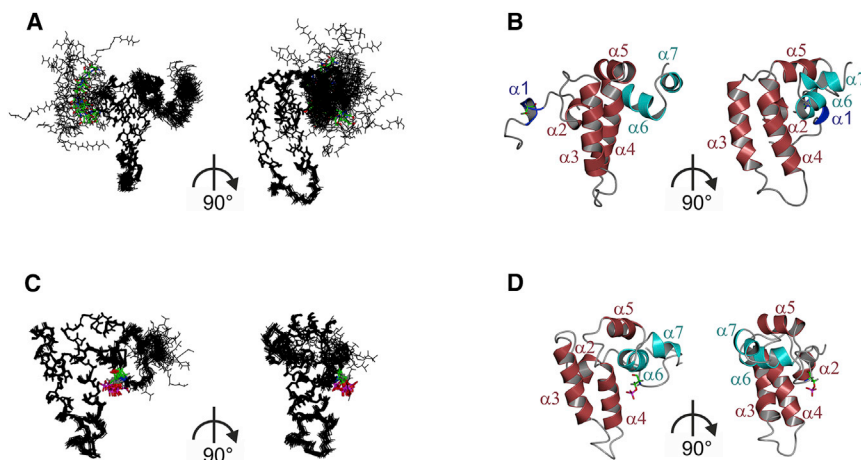

**Figure 2. Structures of Unphosphorylated and Phosphorylated CSP<sub>1-100</sub>**

Ensembles (A and C) and ribbon representations (B and D) of the lowest-energy conformers of CSP<sub>1-100</sub> (A and B) and pCSP<sub>1-100</sub> (C and D); two different views differing by 90° are shown for each, with Ser10 represented as sticks. For the ensembles, all main-chain heavy atoms for 20 structures are displayed (see also Figure S2 for C $\alpha$  backbone ensembles). For the ribbon representations, helices are highlighted in purple ( $\alpha$ 1), red ( $\alpha$ 2– $\alpha$ 5), or cyan ( $\alpha$ 6– $\alpha$ 7).

### Solution Structure of CSP<sub>1-100</sub> in the Non-phosphorylated State

Using conventional triple-resonance NMR spectra, the backbone resonances for 99 of 100 residues of CSP<sub>1-100</sub> were assigned, and the structure was determined with 2,637 distance and dihedral angle restraints (Table 1). This revealed a secondary structure consisting of seven  $\alpha$  helices,  $\alpha$ 1(7–10),  $\alpha$ 2(16–20),  $\alpha$ 3(28–42),  $\alpha$ 4(52–68),  $\alpha$ 5(70–78),  $\alpha$ 6(83–90), and  $\alpha$ 7(93–98) (Figure 1C). These secondary structure elements are well defined, although helices  $\alpha$ 1,  $\alpha$ 6, and  $\alpha$ 7 are much less converged than helices  $\alpha$ 2– $\alpha$ 5 due to the lack of stabilizing helix-helix interactions in the tertiary structure (Figures 2A, 2B, and S2A). Helix  $\alpha$ 1 is a short  $\alpha$  helix located in an otherwise highly flexible, unstructured N-terminal region; helices  $\alpha$ 2– $\alpha$ 5 comprise the autonomously folded J domain; and helices  $\alpha$ 6 and  $\alpha$ 7 are located in the linker region C-terminal to the J domain. The secondary structure and overall fold of helices  $\alpha$ 2– $\alpha$ 5 strongly resemble other previously determined J-domain structures, such as yeast Sis1p (PDB: 4RWU; Figure S3A). Our CSP<sub>1-100</sub> structure is also similar to the structure deposited by the RIKEN Structural Genomics Consortium of a CSP<sub>5-100</sub> construct (PDB: 2CTW; Figure S3B), although clear differences are apparent in the non-J-domain helices:  $\alpha$ 1,  $\alpha$ 6, and  $\alpha$ 7. This is especially evident in the N-terminal  $\alpha$ 1 helix, which is not helical in any of the 20 submitted 2CTW structures. It is likely that the first four residues of CSP, which are absent in the 2CTW construct, are important for  $\alpha$ 1 helix formation.

### A Phosphorylation-Induced Conformational Switch

The  $\alpha$ 1 helix contains the Ser10 residue, which is phosphorylated in vivo and which modulates CSP's cellular functions (Collins et al., 2005; Evans and Morgan, 2005; Evans et al., 2001). To gain insight into how phosphorylation affects CSP structure, purified <sup>13</sup>C/<sup>15</sup>N CSP<sub>1-100</sub> was incubated with MgATP and protein kinase A (PKA). Parallel incubation using unlabeled proteins showed that under these conditions, rapid and efficient phosphorylation on only Ser10 was achieved, as determined by  $\gamma$ <sup>32</sup>-ATP incorporation and mass spectrometry (Figure S4). The incubation mixture containing <sup>13</sup>C/<sup>15</sup>N CSP<sub>1-100</sub>, MgATP, and PKA was used without further purification for structure determination. Triple-resonance heteronuclear NMR spectroscopy with non-uniform sampling (NUS)

was then performed, allowing full data collection for spectral assignment in a short space of time. The spectra revealed significant changes to the chemical shifts for various residues, notably those around Ser10 and Ser81 (Figures 1B and 1C). Based on the mass spectrometry data, the chemical shift effects around S10 are a direct result of Ser10 phosphorylation, whereas those around Ser81 indicate a possible structural change in the loop connecting helices  $\alpha$ 5 and  $\alpha$ 6. Backbone resonance assignments for all 100 assignable amino acid residues were obtained, and the structure of pCSP<sub>1-100</sub> was calculated using 3,301 distance and dihedral angle restraints. Strikingly, the structure of serine10-phosphorylated CSP<sub>1-100</sub> reveals an order-to-disorder transition in the conformation of helix  $\alpha$ 1, which in turn triggers the interaction of the newly disordered N terminus with the J-domain helix  $\alpha$ 4 (Figures 2C, 2D, and S2B). This conformational phospho-switch results in a more compact overall structure of pCSP<sub>1-100</sub> with significantly altered surface charge distribution (Figures 3A and 3B). Notably, the ionic interaction between the negatively charged phosphate group on phospho-Ser10 and the positively charged  $\epsilon$ -amino group of Lys58 stabilizes and sequesters the N-terminal region of CSP (Figures 3C and 3D), which also brings the N-terminal region into much closer proximity to Ser81, hence, explaining the significant chemical shift changes in this region. The interaction between phospho-Ser10 and Lys58 is corroborated by the observation of a network of nuclear Overhauser effects (NOEs) involving the surrounding residues, including phospho-Ser10 to Ser81/Leu82, and Val19 to Glu59/Ile60/Ala63. Unambiguous direct NOEs between phospho-Ser10 and Lys58 are not observed, as the distances between the non-exchangeable protons in the two residues are over 5 Å and, hence, expected to give rise to very weak NOEs. The relatively small chemical shift change in the <sup>15</sup>N-HSQC spectrum around residue Lys58 compared with Ser81 is explained by the lack of conformational change in helix  $\alpha$ 4.

### DISCUSSION

The conformational phospho-switch reported here provides a structural basis for the previously established effects of Ser10 phosphorylation on CSP function. By destabilizing the N-terminal  $\alpha$ 1 helix and reducing its accessibility, phosphorylation would weaken protein-protein interactions involving this region, potentially explaining how Ser10 phosphorylation reduces CSP

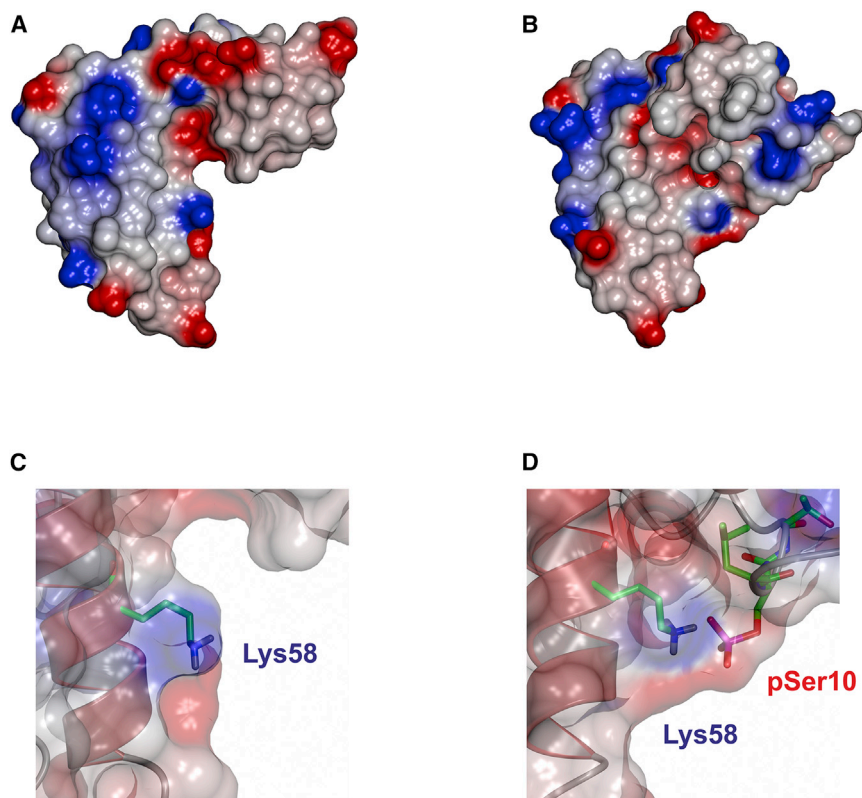

**Figure 3. Phosphorylation of Ser10 Triggers a Conformational Switch**

(A and B) Surface representation of the lowest-energy conformers of CSP<sub>1-100</sub> and pCSP<sub>1-100</sub>. (C) Close-up view of Lys58, represented as sticks, showing the surface-exposed positively charged patch in CSP<sub>1-100</sub>. (D) Phosphorylation triggers the interaction of phospho-Ser10 and Lys58, altering the surface charge distribution in this region.

binding to syntaxin and synaptotagmin (Evans and Morgan, 2002; Evans et al., 2001). In contrast, the structure of the J domain and the accessibility of the HPD motif required for Hsp70 activation are unaffected by Ser10 phosphorylation (Figure 4A), thus revealing why CSP phosphorylation has no effect on Hsp70 interactions (Evans et al., 2001). Finally, the new interface created jointly by the phosphorylated N terminus and  $\alpha$ 4 helix (Figure 3B) provides a novel scaffold for protein and/or lipid interactions that could explain the effects of Ser10 phosphorylation on fusion pore expansion during exocytosis (Chiang et al., 2014; Evans and Morgan, 2002; Evans et al., 2001; Prescott et al., 2008).

Phosphorylation-induced order/disorder transitions, as shown here for CSP, are becoming increasingly recognized as regulatory switches that control protein function. For example, phosphorylation of retinoblastoma protein on Ser608 causes the disordered loop containing this residue to interact with the binding pocket for the E2F transactivation domain, thus inhibiting E2F binding (Burke et al., 2012). In addition, multi-site phosphorylation of folded pentameric nucleophosmin has been shown to cause electrostatic repulsion between the protomers and a transition to unfolded monomers, thereby destabilizing binding sites that exist in the oligomeric protein (Mitrea et al., 2014). Finally, a phosphorylation-induced disorder-to-order transition in 4E-BP2 has recently been shown to reduce eIF4E binding by sequestering a helical binding motif into a  $\beta$  strand (Bah et al., 2015).

The N-terminal domain of CSP is phosphorylated in vivo in humans, rodents, flies, and worms (Collins et al., 2005; Evans and Morgan, 2005; Evans et al., 2001; Hilger et al., 2009; Zielinska et al., 2009), indicating that phospho-regulation of CSP is as

evolutionarily conserved as its role in preventing neurodegeneration. Given that 36 of the 41 DnaJ proteins encoded by the human genome are serine/threonine phosphorylated (Hornbeck et al., 2015), the CSP phospho-switch revealed here could be a general mechanism for conformational regulation of DnaJ/Hsp40 chaperones. Indeed, the Lys58 residue that interacts with phospho-Ser10 in CSP has long been recognized to be among the most highly conserved residues in DnaJ proteins (Hennessy et al., 2005) (Figure 4B), although the reason for this conservation has been unclear. Furthermore, Lys58 in CSP is a ubiquitination site (Wagner et al., 2011), as are the orthologous

Lys residues in human DNAJA1 and DNAJB1. The close interaction of phospho-Ser10 with Lys58 revealed here would likely impede access by E3 ligases, thereby antagonizing CSP ubiquitination. Given that phosphorylation of 4E-BP2 has recently been shown to inhibit Lys57 ubiquitination by triggering a disorder-to-order transition (Bah et al., 2015), the phospho-switch reported here may represent an alternative mechanism for regulating protein conformation by reciprocally antagonistic posttranslational modifications.

## EXPERIMENTAL PROCEDURES

### Expression and Purification of CSP

Full-length CSP<sub>1-198</sub> in the pQE30 vector (QIAGEN) has been previously described (Evans et al., 2001) and was used to prepare the CSP14CS, CSP<sub>137-198</sub>, and CSP<sub>1-112</sub> constructs via site-directed mutagenesis. CSP<sub>1-100</sub> was synthesized (Geneart; Life Technologies) based on the human coding sequence and codon optimized for expression in *Escherichia coli* and subcloned into the pE-SumoPro Kan expression vector (LifeSensors). Expression of recombinant CSP was induced in *E. coli* BL21 Star (Invitrogen) competent cells using 1 mM isopropyl  $\beta$ -D-1-thiogalactopyranoside at 18°C for 18 hr. Uniformly isotope-labeled CSP was expressed in M9 minimal media with <sup>15</sup>NH<sub>4</sub>Cl and/or <sup>13</sup>C<sub>6</sub>-glucose as the sole nitrogen and carbon sources, respectively. Cells were harvested by centrifugation and resuspended in lysis buffer containing 20 mM Tris (pH 7.5), 500 mM NaCl, 20 mM imidazole with protease inhibitors (complete mini EDTA-free protease inhibitor cocktail tablets; Roche). After lysis by cell disruption, the soluble fraction was isolated by centrifugation at 27,000  $\times$  g for 45 min. The supernatant was applied to a charged HisTrap FF 5 ml affinity column (GE Healthcare), washed with 20 mM Tris (pH 7.5), 500 mM NaCl, 50 mM imidazole, and purified protein eluted with a linear imidazole gradient from 50 mM to 500 mM. The His-SUMO tag on CSP<sub>1-100</sub> was removed by incubation with recombinant ULP-1 overnight at 4°C. The CSP<sub>1-100</sub> protein was subjected to gel filtration through a Superdex-75 column (GE Healthcare)

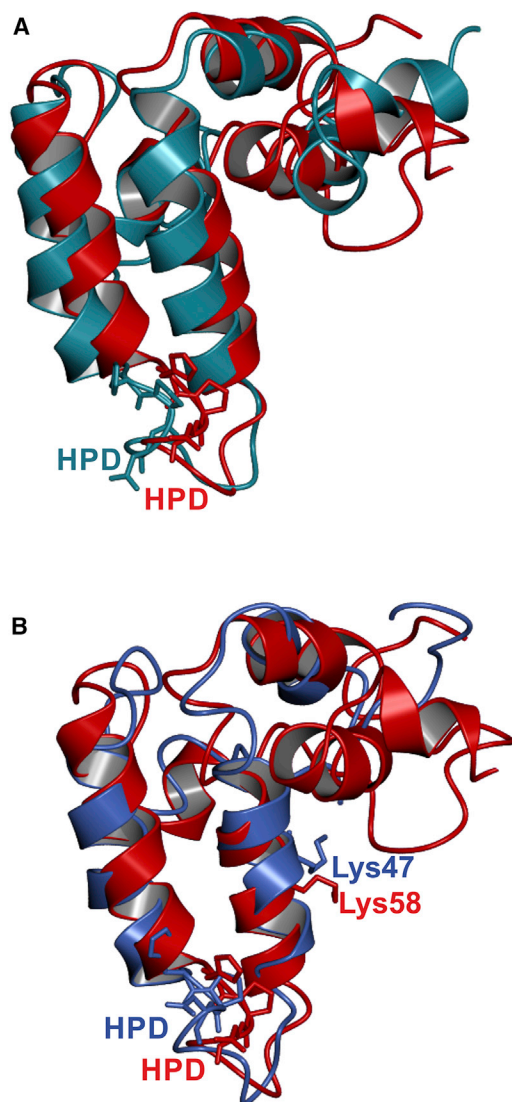

**Figure 4. Implications of CSP Phosphorylation for Interactions with Hsc70 and Ubiquitin Ligases**

(A) Overlay of CSP<sub>1-100</sub> (blue) and pCSP<sub>1-100</sub> (red), with the conserved HPD motif represented as sticks.

(B) Overlay of *E. coli* DnaJ (PDB: 1BQ0; blue) with human pCSP<sub>1-100</sub> (red), with the conserved Lys58 and Lys48 residues, respectively, and HPD motifs represented as sticks.

equilibrated with 20 mM 2-(N-morpholino)ethanesulfonic acid (pH 6.5), 150 mM NaCl.

#### In Vitro Phosphorylation

Purified CSP<sub>1-100</sub> was phosphorylated by mixing in a 340:1 molar ratio with protein kinase A catalytic subunit (Sigma-Aldrich), 1 mM DTT, 10 mM MgCl<sub>2</sub>, 0.5 mM EDTA, and 1 mM ATP. For analysis of phosphorylation kinetics, mixtures were supplemented with 3  $\mu$ Ci of radiolabeled  $\gamma$ -<sup>32</sup>P-ATP per 50  $\mu$ l reaction and incubated for various times before stopping the reaction by addition of boiling 2 $\times$  Laemmli buffer (Sigma-Aldrich). Samples were run on pre-cast Novex SDS-PAGE gels (Invitrogen), stained with Coomassie blue, dried, and exposed to phosphor screens overnight before imaging on a Phosphorimager Si (GE Healthcare). For NMR spectroscopy and mass spectrometry analyses, in vitro phosphorylation mixtures were prepared using non-radiolabeled ATP and incubated for 4 hr to ensure the reaction was complete.

#### Estimation of Native Molecular Mass

Analytical ultracentrifugation was performed at the Astbury Center for Structural Molecular Biology, University of Leeds. CSP protein samples were spun at 50,000 rpm at 20.1°C for 9 hr for sedimentation velocity analysis, during which 98 absorbance scans at 279 nm were performed and used to estimate the native molecular mass. Size-exclusion chromatography-multiple-angle laser light scattering analysis was performed using a Dawn Helelos instrument at a laser wavelength of 658 nm.

#### Mass Spectrometry

Phosphorylation site mapping was performed at the FingerPrints' Proteomics Facility, University of Dundee. PKA-phosphorylated CSP<sub>1-100</sub> protein was separated by SDS-PAGE, digested with trypsin, and then extracted before being applied to an nLC liquid chromatography system (Dionex/LC Packings) coupled to a 4000 QTRAP mass spectrometer (Applied Biosystems/Sciex). Mass spectrometry data were filtered by removing missed cleavages and employing a 1% false discovery rate.

#### NMR Spectroscopy

All spectra were acquired at 298 K on Bruker Avance III 600 MHz and 800 MHz spectrometers. For non-phosphorylated CSP<sub>1-100</sub>, sequence-specific backbone resonance assignment was obtained using standard multidimensional heteronuclear NMR experiments: HNCA, HN(CO)CA, HNCACB, CBCA(CO)NH, HNCO, HNCACO, HBHANH, HBHA(CO)NH. Side-chain assignments were obtained from a 3D HCCH total correlation spectroscopy (HCCH-TOCSY) experiment. NOEs were derived from 3D <sup>15</sup>N- and <sup>13</sup>C-edited NOE spectroscopy (NOESY)-HSQC experiments with 130 ms mixing time. For pCSP<sub>1-100</sub>, sequence-specific backbone resonance assignment was obtained using the multidimensional heteronuclear NMR experiments as described above, with NUS. Side-chain assignments were obtained from a 3D HCCH-TOCSY experiment. NOEs were derived from 3D <sup>15</sup>N- and <sup>13</sup>C-edited NOESY-HSQC experiments with 140 ms mixing time.

#### NMR Assignments and Structure Calculations

All NMR spectra were processed with TopSpin (Bruker) and analyzed using the CCPN Analysis package (Vranken et al., 2005). Backbone torsion angles were derived from analysis of H $\alpha$ , C $\alpha$ , C $\beta$ , and C' chemical shifts using the DANGLE program (Cheung et al., 2010). All structure calculations were carried out using the Aria package (Rieping et al., 2007) with the IUPAC PARALLHDGv5.3 and TOPALLHDGv5.3 parameter sets. Structural statistics are summarized in Table 1.

#### ACCESSION NUMBERS

Coordinates and chemical shifts have been deposited in the PDB and Biological Magnetic Resonance Bank under accession codes PDB: 2N05 and BMRB: 25515 for CSP<sub>1-100</sub>, and PDB: 2N04 and BMRB: 25514 for pCSP<sub>1-100</sub>.

#### SUPPLEMENTAL INFORMATION

Supplemental Information includes four figures and can be found with this article online at <http://dx.doi.org/10.1016/j.str.2016.06.009>.

#### AUTHOR CONTRIBUTIONS

P.P., G.R.P., and A.M. performed protein purification and biochemical experiments; P.P. and L.Y.L. performed NMR experiments; P.P. performed structure calculations; P.P., L.Y.L., R.D.B., and A.M. analyzed and interpreted the data. A.M., L.Y.L., and R.D.B. conceived and designed the study. P.P. and A.M. wrote the manuscript with input from all authors.

#### ACKNOWLEDGMENTS

This work was supported by a grant from the Wellcome Trust to A.M., L.Y.L., and R.D.B. (grant ref. 090077/Z/09/Z). G.R.P. was supported by a Wellcome Trust PhD studentship.

Received: April 6, 2016  
 Revised: May 17, 2016  
 Accepted: June 2, 2016  
 Published: July 21, 2016

## REFERENCES

- Arnold, C., Reisch, N., Leibold, C., Becker, S., Prufert, K., Sautter, K., Palm, D., Jatzke, S., Buchner, S., and Buchner, E. (2004). Structure-function analysis of the cysteine string protein in *Drosophila*: cysteine string, linker and C terminus. *J. Exp. Biol.* *207*, 1323–1334.
- Bah, A., Vernon, R.M., Siddiqui, Z., Krzeminski, M., Muhandiram, R., Zhao, C., Sonenberg, N., Kay, L.E., and Forman-Kay, J.D. (2015). Folding of an intrinsically disordered protein by phosphorylation as a regulatory switch. *Nature* *519*, 106–109.
- Boal, F., Laguerre, M., Milochau, A., Lang, J., and Scotti, P.A. (2011). A charged prominence in the linker domain of the cysteine-string protein CSPalpha mediates its regulated interaction with the calcium sensor synaptotagmin 9 during exocytosis. *FASEB J.* *25*, 132–143.
- Braun, J.E.A., Wilbanks, S.M., and Scheller, R.H. (1996). The cysteine string secretory vesicle protein activates Hsc70 ATPase. *J. Biol. Chem.* *271*, 25989–25993.
- Bronk, P., Nie, Z., Klose, M.K., Dawson-Scully, K., Zhang, J., Robertson, R.M., Atwood, H.L., and Zinsmaier, K.E. (2005). The multiple functions of cysteine-string protein analyzed at *Drosophila* nerve terminals. *J. Neurosci.* *25*, 2204–2214.
- Burgoyne, R.D., and Morgan, A. (2011). Chaperoning the SNAREs: a role in preventing neurodegeneration? *Nat. Cell Biol.* *13*, 8–9.
- Burgoyne, R.D., and Morgan, A. (2015). Cysteine string protein (CSP) and its role in preventing neurodegeneration. *Semin. Cell Dev. Biol.* *40*, 153–159.
- Burke, J.R., Hura, G.L., and Rubin, S.M. (2012). Structures of inactive retinoblastoma protein reveal multiple mechanisms for cell cycle control. *Genes Dev.* *26*, 1156–1166.
- Chamberlain, L.H., and Burgoyne, R.D. (1997a). Activation of the ATPase activity of heat shock proteins Hsc70/Hsp70 by cysteine-string protein. *Biochem. J.* *322*, 853–858.
- Chamberlain, L.H., and Burgoyne, R.D. (1997b). The molecular chaperone function of the secretory vesicle cysteine string proteins. *J. Biol. Chem.* *272*, 31420–31426.
- Chamberlain, L.H., and Burgoyne, R.D. (1998). The cysteine string domain of the secretory vesicle cysteine string protein is required for membrane targeting. *Biochem. J.* *335*, 205–209.
- Chamberlain, L.H., and Burgoyne, R.D. (2000). Cysteine-string protein: the chaperone at the synapse. *J. Neurochem.* *74*, 1781–1789.
- Chamberlain, L.H., Graham, M.E., Kane, S., Jackson, J.L., Maier, V.H., Burgoyne, R.D., and Gould, G.W. (2001). The synaptic vesicle protein, cysteine-string protein, is associated with the plasma membrane in 3T3-L1 adipocytes and interacts with syntaxin 4. *J. Cell Sci.* *114*, 445–455.
- Cheung, M.S., Maguire, M.L., Stevens, T.J., and Broadhurst, R.W. (2010). DANGLE: a Bayesian inferential method for predicting protein backbone dihedral angles and secondary structure. *J. Magn. Reson.* *202*, 223–233.
- Chiang, N., Hsiao, Y.T., Yang, H.J., Lin, Y.C., Lu, J.C., and Wang, C.T. (2014). Phosphomimetic mutation of cysteine string protein-alpha increases the rate of regulated exocytosis by modulating fusion pore dynamics in PC12 cells. *PLoS One* *9*, e99180.
- Collins, M.O., Yu, L., Coba, M.P., Husi, H., Campuzano, I., Blackstock, W.P., Choudhary, J.S., and Grant, S.G. (2005). Proteomic analysis of in vivo phosphorylated synaptic proteins. *J. Biol. Chem.* *280*, 5972–5982.
- Evans, G.J.O., and Morgan, A. (2002). Phosphorylation-dependent interaction of the synaptic vesicle proteins cysteine string protein and synaptotagmin I. *Biochem. J.* *364*, 343–347.
- Evans, G.J., and Morgan, A. (2005). Phosphorylation of cysteine string protein in the brain: developmental, regional and synaptic specificity. *Eur. J. Neurosci.* *21*, 2671–2680.
- Evans, G.J.O., Wilkinson, M.C., Graham, M.E., Turner, K.M., Chamberlain, L.H., Burgoyne, R.D., and Morgan, A. (2001). Phosphorylation of cysteine string protein by protein kinase A: implications for the modulation of exocytosis. *J. Biol. Chem.* *276*, 47877–47885.
- Fernandez-Chacon, R., Wolfel, M., Nishimune, H., Tabares, L., Schmitz, F., Castellano-Munoz, M., Rosenmund, C., Montesinos, M.L., Sanes, J.R., Schneggenburger, R., et al. (2004). The synaptic vesicle protein CSP alpha prevents presynaptic degeneration. *Neuron* *42*, 237–251.
- Greaves, J., and Chamberlain, L.H. (2006). Dual role of the cysteine-string domain in membrane binding and palmitoylation-dependent sorting of the molecular chaperone cysteine-string protein. *Mol. Biol. Cell* *17*, 4748–4759.
- Gundersen, C.B., Mastrogiacomo, A., Faull, K., and Umbach, J.A. (1994). Extensive lipidation of a torpedo cysteine string protein. *J. Biol. Chem.* *269*, 19197–19199.
- Hennessy, F., Nicoll, W.S., Zimmermann, R., Cheetham, M.E., and Blatch, G.L. (2005). Not all J domains are created equal: implications for the specificity of Hsp40-Hsp70 interactions. *Protein Sci.* *14*, 1697–1709.
- Hilger, M., Bonaldi, T., Gnad, F., and Mann, M. (2009). Systems-wide analysis of a phosphatase knock-down by quantitative proteomics and phosphoproteomics. *Mol. Cell Proteomics* *8*, 1908–1920.
- Hornbeck, P.V., Zhang, B., Murray, B., Kornhauser, J.M., Latham, C.F., and Skrzybec, E. (2015). PhosphoSitePlus, 2014: mutations, PTMs and recalibrations. *Nucleic Acids Res.* *43*, D512–D520.
- Kashyap, S.S., Johnson, J.R., McCue, H.V., Chen, X., Edmonds, M.J., Ayala, M., Graham, M.E., Jenn, R.C., Barclay, J.W., Burgoyne, R.D., et al. (2014). *Caenorhabditis elegans* dnj-14, the orthologue of the DNAJC5 gene mutated in adult onset neuronal ceroid lipofuscinosis, provides a new platform for neuroprotective drug screening and identifies a SIR-2.1-independent action of resveratrol. *Hum. Mol. Genet.* *23*, 5916–5927.
- Magga, J.M., Jarvis, S.E., Arnot, M.I., Zamponi, G.W., and Braun, J.E. (2000). Cysteine string protein regulates G protein modulation of N-type calcium channels. *Neuron* *28*, 195–204.
- Mitrea, D.M., Grace, C.R., Buljan, M., Yun, M.K., Pytel, N.J., Satumba, J., Nourse, A., Park, C.G., Madan Babu, M., White, S.W., et al. (2014). Structural polymorphism in the N-terminal oligomerization domain of NPM1. *Proc. Natl. Acad. Sci. USA* *111*, 4466–4471.
- Nie, Z., Ranjan, R., Wenniger, J.J., Hong, S.N., Bronk, P., and Zinsmaier, K.E. (1999). Overexpression of cysteine-string proteins in *Drosophila* reveals interactions with syntaxin. *J. Neurosci.* *19*, 10270–10279.
- Noskova, L., Stranecky, V., Hartmannova, H., Pristoupilova, A., Baresova, V., Ivanek, R., Hulkova, H., Jahnova, H., van der Zee, J., Staropoli, J.F., et al. (2011). Mutations in DNAJC5, encoding cysteine-string protein alpha, cause autosomal-dominant adult-onset neuronal ceroid lipofuscinosis. *Am. J. Hum. Genet.* *89*, 241–252.
- Ohyama, T., Verstreken, P., Ly, C.V., Rosenmund, T., Rajan, A., Tien, A.C., Haueter, C., Schulze, K.L., and Bellen, H.J. (2007). Huntingtin-interacting protein 14, a palmitoyl transferase required for exocytosis and targeting of CSP to synaptic vesicles. *J. Cell Biol.* *179*, 1481–1496.
- Prescott, G.R., Jenkins, R.E., Walsh, C.M., and Morgan, A. (2008). Phosphorylation of cysteine string protein on Serine 10 triggers 14-3-3 protein binding. *Biochem. Biophys. Res. Commun.* *377*, 809–814.
- Rieping, W., Habeck, M., Bardiaux, B., Bernard, A., Malliavin, T.E., and Nilges, M. (2007). ARIA2: automated NOE assignment and data integration in NMR structure calculation. *Bioinformatics* *23*, 381–382.
- Sharma, M., Burre, J., and Sudhof, T.C. (2011). CSPalpha promotes SNARE-complex assembly by chaperoning SNAP-25 during synaptic activity. *Nat. Cell Biol.* *13*, 30–39.
- Sharma, M., Burre, J., Bronk, P., Zhang, Y., Xu, W., and Sudhof, T.C. (2012). CSPalpha knockout causes neurodegeneration by impairing SNAP-25 function. *EMBO J.* *31*, 829–841.
- Stowers, R.S., and Isacoff, E.Y. (2007). *Drosophila* huntingtin-interacting protein 14 is a presynaptic protein required for photoreceptor synaptic transmission and expression of the palmitoylated proteins synaptosome-associated protein 25 and cysteine string protein. *J. Neurosci.* *27*, 12874–12883.

- Swayne, L.A., Blattler, C., Kay, J.G., and Braun, J.E. (2003). Oligomerization characteristics of cysteine string protein. *Biochem. Biophys. Res. Commun.* *300*, 921–926.
- Swayne, L.A., Beck, K.E., and Braun, J.E. (2006). The cysteine string protein multimeric complex. *Biochem. Biophys. Res. Commun.* *348*, 83–91.
- Vranken, W.F., Boucher, W., Stevens, T.J., Fogh, R.H., Pajon, A., Llinas, M., Ulrich, E.L., Markley, J.L., Ionides, J., and Laue, E.D. (2005). The CCPN data model for NMR spectroscopy: development of a software pipeline. *Proteins* *59*, 687–696.
- Wagner, S.A., Beli, P., Weinert, B.T., Nielsen, M.L., Cox, J., Mann, M., and Choudhary, C. (2011). A proteome-wide, quantitative survey of in vivo ubiquitylation sites reveals widespread regulatory roles. *Mol. Cell Proteomics* *10*, M111 013284.
- Zhang, H., Kelley, W.L., Chamberlain, L.H., Burgoyne, R.D., and Lang, J. (1999). Mutational analysis of cysteine-string protein function in insulin exocytosis. *J. Cell Sci.* *112*, 1345–1351.
- Zhang, Y.Q., Henderson, M.X., Colangelo, C.M., Ginsberg, S.D., Bruce, C., Wu, T., and Chandra, S.S. (2012). Identification of CSPalpha clients reveals a role in dynamin 1 regulation. *Neuron* *74*, 136–150.
- Zielinska, D.F., Gnad, F., Jedrusik-Bode, M., Wisniewski, J.R., and Mann, M. (2009). *Caenorhabditis elegans* has a phosphoproteome atypical for metazoans that is enriched in developmental and sex determination proteins. *J. Proteome Res.* *8*, 4039–4049.
- Zinsmaier, K.E., Eberle, K.K., Buchner, E., Walter, N., and Benzer, S. (1994). Paralysis and early death in cysteine string protein mutants of *Drosophila*. *Science* *263*, 977–980.



**Structure, Volume 24**

**Supplemental Information**

**Phosphorylation of Cysteine String Protein**

**Triggers a Major Conformational Switch**

**Pryank Patel, Gerald R. Prescott, Robert D. Burgoyne, Lu-Yun Lian, and Alan Morgan**

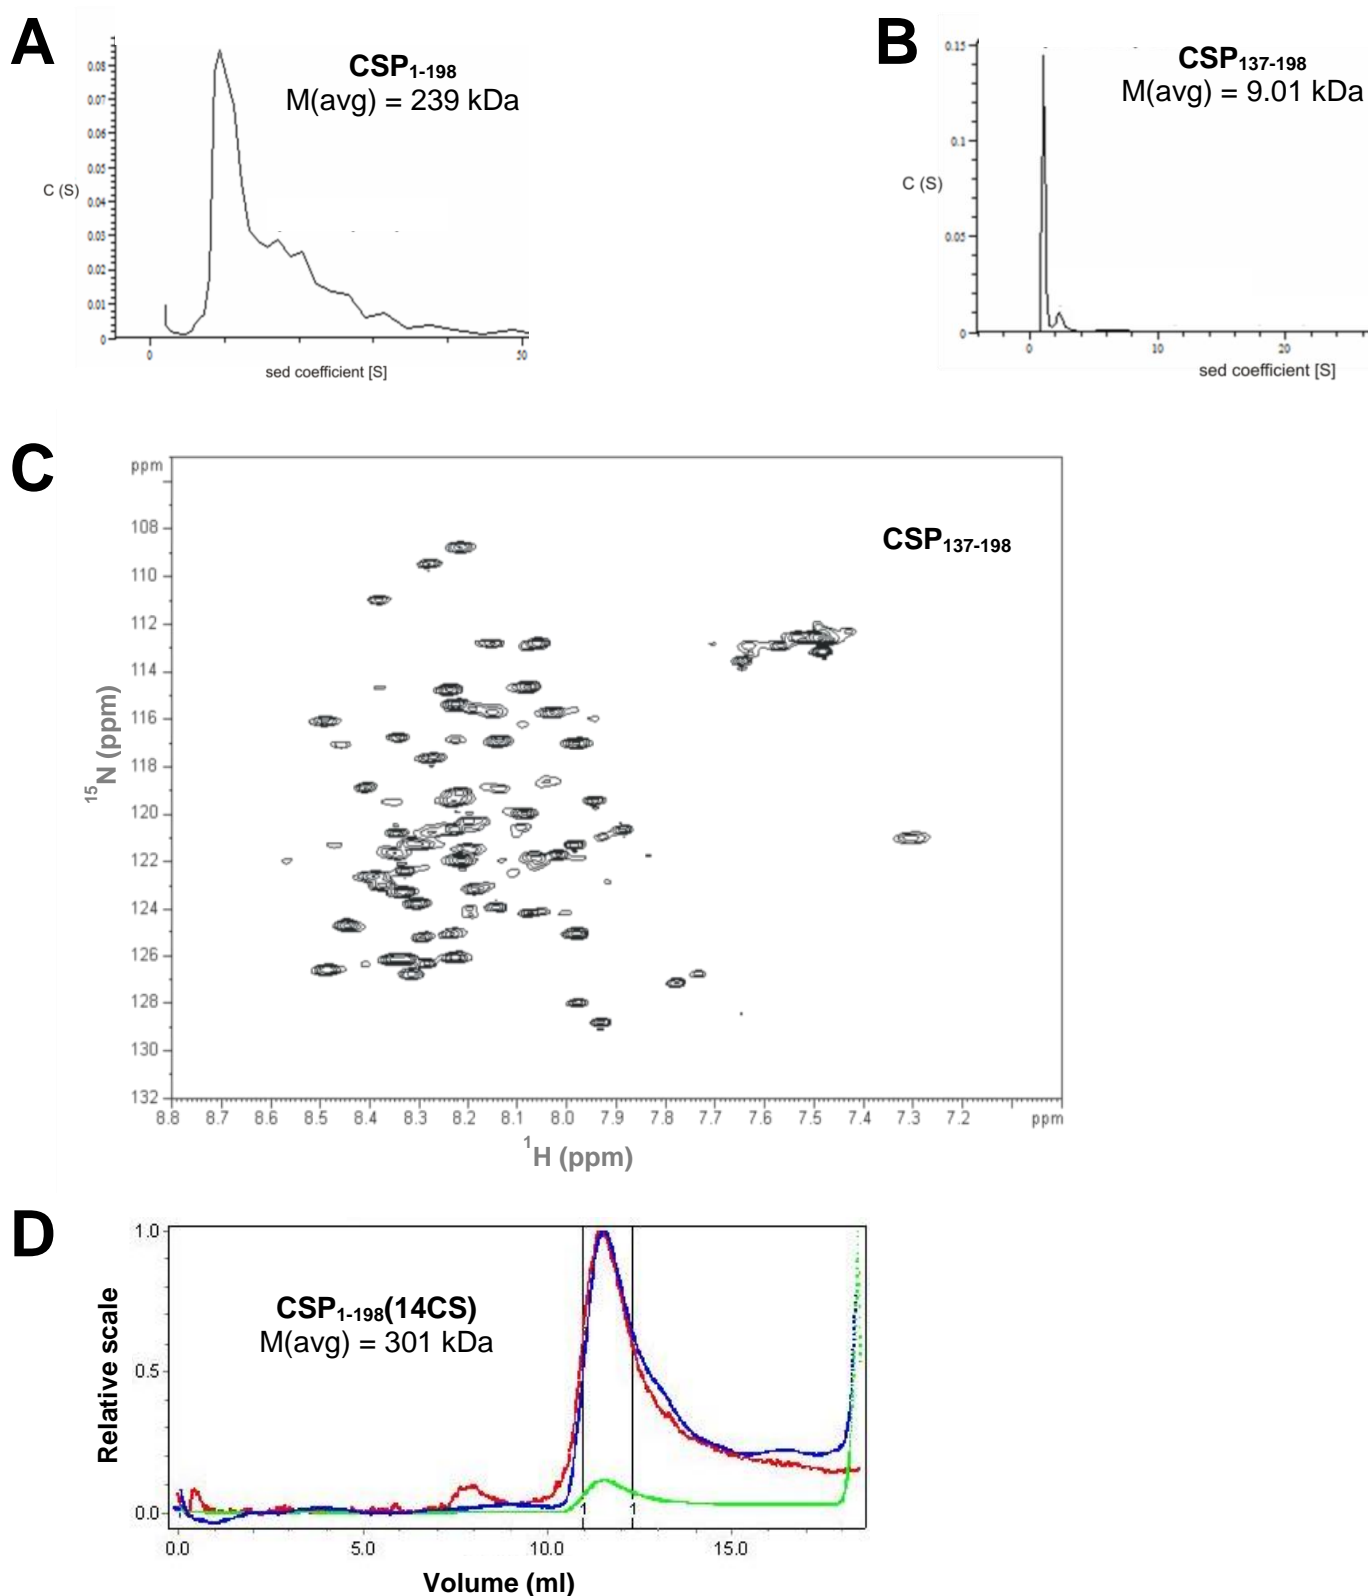

**Fig. S1, related to Fig. 1: Characterisation of recombinant CSP constructs**

a) Analytical ultracentrifugation of full length CSP<sub>1-198</sub>. b) Analytical ultracentrifugation of CSP<sub>137-198</sub>. c) <sup>1</sup>H-<sup>15</sup>N HSQC spectra of CSP<sub>137-198</sub>. d) Size exclusion chromatography - multiple angle laser light scattering analysis of full length CSP<sub>1-198</sub> with all 14 cysteines mutated to serines (14CS).

**A**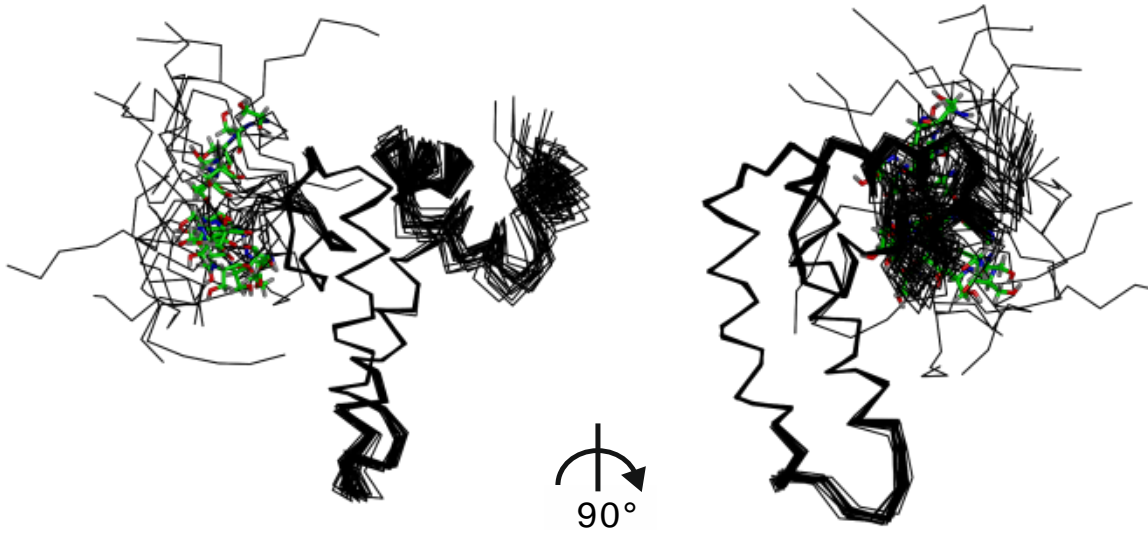**B**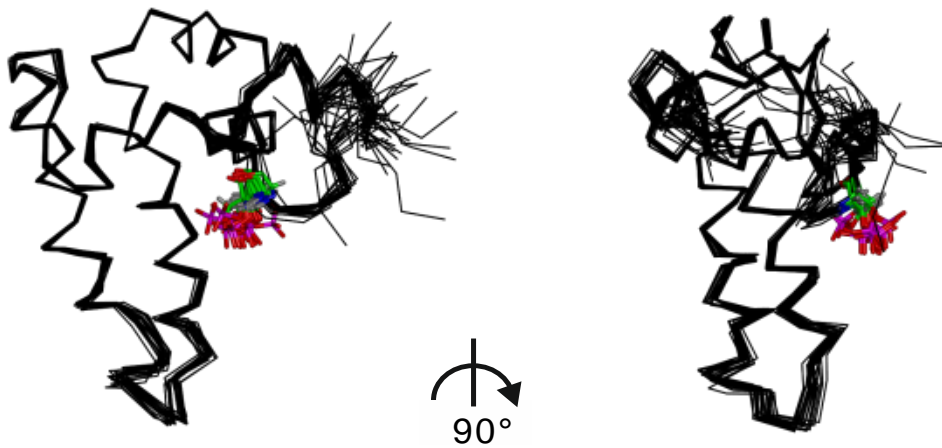

**Fig. S2, related to Fig. 2: Structures of unphosphorylated and Ser10-phosphorylated CSP<sub>1-100</sub>.**

Ensembles of the 20 lowest energy conformers of CSP<sub>1-100</sub> (a) and pCSP<sub>1-100</sub> (b) displayed as C $\alpha$  backbone representations; two different views differing by 90° are shown for each, with Ser10 represented as sticks.

**A**

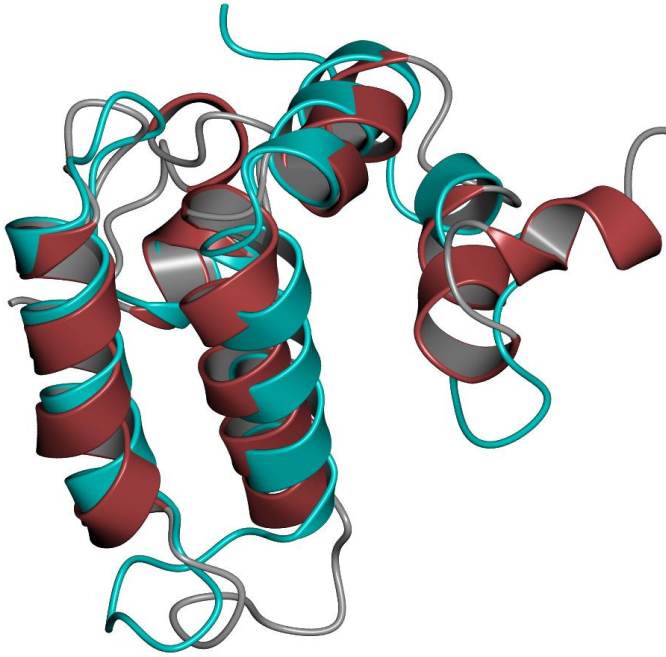

**B**

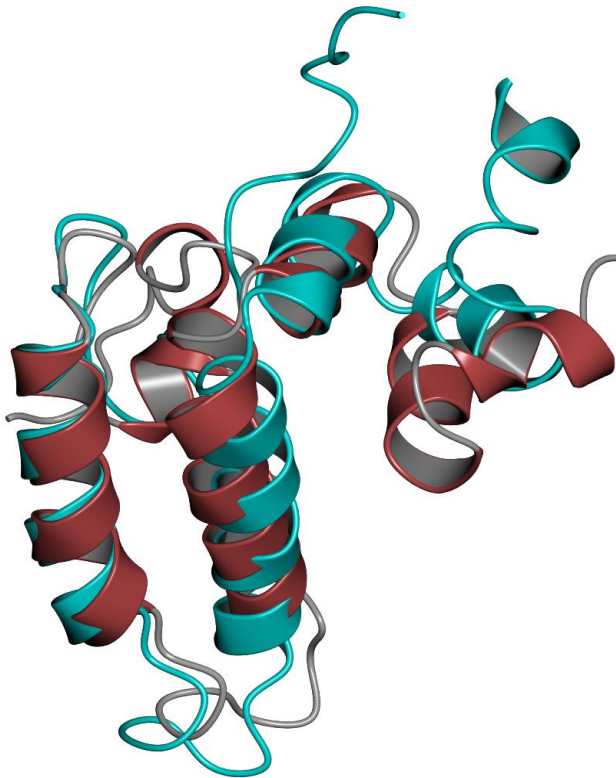

**Fig. S3, related to Fig. 2: Structural similarities between CSP<sub>1-100</sub> and DnaJ/Hsp40 proteins in the unphosphorylated state.**

a) Overlay of the lowest energy conformer of CSP<sub>1-100</sub> (red) with the J domain of yeast Sis1 protein (PDB code: 4RWU, cyan). b) Overlay of the lowest energy conformer of CSP<sub>1-100</sub> (red) with CSP<sub>5-100</sub> (PDB code: 2CTW, blue).

**A**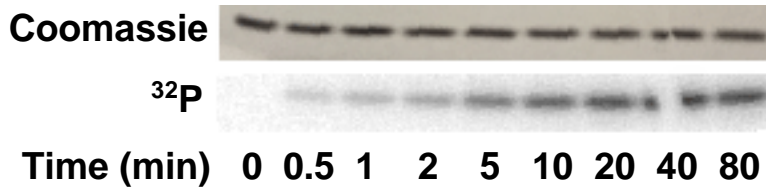**B**

| Sequence          | # PSMs | Modifications                | IonScore | Exp Value | Charge | MH+ [Da] | ΔM [ppm] | RT [min] | # Missed Cleavages |
|-------------------|--------|------------------------------|----------|-----------|--------|----------|----------|----------|--------------------|
| SLsTSGESLYHVLGLDK | 153    | S10(Phospho)                 | 63       | 0.000     | 2      | 1885.895 | 0.31     | 67.11    | 0                  |
| sLsTSGESLYHVLGLDK | 33     | N-Term(Acetyl); S10(Phospho) | 50       | 0.000     | 2      | 1927.906 | 0.52     | 77.20    | 0                  |
| sLsTSGESLYHVLGLDK | 33     | S8(Phospho); S10(Phospho)    | 40       | 0.002     | 2      | 1965.861 | 0.16     | 76.41    | 0                  |

**Fig. S4, related to Fig. 3: *in vitro* phosphorylation of CSP<sub>1-100</sub>.**

a) Kinetics of  $\gamma^{32}$ -ATP incorporation following incubation of CSP<sub>1-100</sub> with protein kinase A and radiolabelled MgATP. Samples were run on SDS-PAGE and visualised by Coomassie Blue staining (*Coomassie*, upper panel) and phosphorimaging ( $^{32}$ P, lower panel). Images shown are cropped to remove unnecessary blank space. b) Mass spectrometric identification of phosphorylation sites on CSP<sub>1-100</sub> after incubation with protein kinase A and MgATP.
